# Supplementary material
Source: PubMed Central journal article supplement (PMC9393605)
Supplement: sj-pdf-1-bji-10.1177_17571774221092553.pdf [file sj-pdf-1-bji-10.1177_17571774221092553.pdf]

## 2Supplementary Material

### Supplementary Figure I

| <div style="background-color: #003366; color: white; padding: 5px; text-align: center;"> <b>Gap Analysis for Hospital acquired COVID</b> </div>      |                                                                                                                                                                                                                                  |                           |                                                                                                                                                                                                                            |                 |
|------------------------------------------------------------------------------------------------------------------------------------------------------|----------------------------------------------------------------------------------------------------------------------------------------------------------------------------------------------------------------------------------|---------------------------|----------------------------------------------------------------------------------------------------------------------------------------------------------------------------------------------------------------------------|-----------------|
| Please do not use names or initials of staff involved in the incident, in the content of this report                                                 |                                                                                                                                                                                                                                  |                           |                                                                                                                                                                                                                            |                 |
| <b>Gap Analysis for Hospital acquired COVID</b><br><small>Use the questions below to help identify any gaps in standards in Coronavirus Care</small> |                                                                                                                                                                                                                                  | Incident report reference | Click here to enter text.                                                                                                                                                                                                  |                 |
| <b>What should have happened</b><br><small>Infectious Disease Guidance</small>                                                                       |                                                                                                                                                                                                                                  | What actually happened    | <b>Explanation of the gaps in care identified.</b><br><small>Did the gaps in care compromise care? Why did the gaps in care occur?<br/>                     (Please complete this section if No or not applicable)</small> | *CDP/SDP/PL     |
| 1.                                                                                                                                                   | Was there a medical review and possibility of COVID documented within the notes? (within 12 hours)                                                                                                                               | Choose an item.           | Click here to enter text.                                                                                                                                                                                                  | Choose an item. |
| 2.                                                                                                                                                   | Was a surgical mask provided to the patient? (within 1 hour)                                                                                                                                                                     | Choose an item.           | Click here to enter text.                                                                                                                                                                                                  | Choose an item. |
| 3.                                                                                                                                                   | Was there a discussion with infection control (in hours) or virology (out of hours)? (within 1 hour)                                                                                                                             | Choose an item.           | Click here to enter text.                                                                                                                                                                                                  | Choose an item. |
| 4.                                                                                                                                                   | Was there closure of their bay? (within 1 hour)                                                                                                                                                                                  | Choose an item.           | Click here to enter text.                                                                                                                                                                                                  | Choose an item. |
| 5.                                                                                                                                                   | Was there Isolation of the patient in a side room (or, if not available, appropriate escalation to bed managers and/or operations team)? (within 2 hours)                                                                        | Choose an item.           | Click here to enter text.                                                                                                                                                                                                  | Choose an item. |
| 6.                                                                                                                                                   | Was there an appropriate change of PPE for both the patient and their contacts if in a bay? (within 2 hours)                                                                                                                     | Choose an item.           | Click here to enter text.                                                                                                                                                                                                  | Choose an item. |
| 7.                                                                                                                                                   | Was there a collection of a swab from the patient? (within 2 hours)                                                                                                                                                              | Choose an item.           | Click here to enter text.                                                                                                                                                                                                  | Choose an item. |
| 8.                                                                                                                                                   | Was the patient moved to a COVID cohort area when a result became available, if clinically appropriate? (within 12 hours)                                                                                                        | Choose an item.           | Click here to enter text.                                                                                                                                                                                                  | Choose an item. |
| 9.                                                                                                                                                   | Were the contacts in bays monitored and isolated for 14 days? (Bay contact should not be moved to another bay / ward unless isolated from other patient's for 14 days from the time that the index case is moved out of the bay) | Choose an item.           | Click here to enter text.                                                                                                                                                                                                  | Choose an item. |
| 10.                                                                                                                                                  | Were the contacts' infection status updated to 'COVID contact' in their electronic health record?                                                                                                                                | Choose an item.           | Click here to enter text.                                                                                                                                                                                                  | Choose an item. |
| 11.                                                                                                                                                  | Did the patient's bed space receive an appropriate clean prior to their arrival?                                                                                                                                                 | Choose an item.           | Click here to enter text.                                                                                                                                                                                                  | Choose an item. |
| 12.                                                                                                                                                  | Did the patient's bed space receive an appropriate clean (if in an open bay) following their move out? (within 2 hours)                                                                                                          | Choose an item.           | Click here to enter text.                                                                                                                                                                                                  | Choose an item. |

\*Care Delivery Problem (CDP), Service Delivery Problem (SDP) and Peripheral Learning (PL)

**Supplementary Figure A1: Gap analysis form used to undertake an assessment of care of a patient once diagnosed with SARS CoV-2 infection against 12 pre-specified standards**

**Supplementary Table 1 Gap analysis: adherence to standards**

| Standard                                                                                                              | Adherence to Standard |                 |      |
|-----------------------------------------------------------------------------------------------------------------------|-----------------------|-----------------|------|
|                                                                                                                       |                       | Number (n = 58) | %    |
| <b>1 Medical review and possibility of COVID-19 documented within 12 hours of symptom onset?</b>                      | Yes                   | 52              | 89.7 |
|                                                                                                                       | No                    | 3               | 5.2  |
|                                                                                                                       | Not Applicable        | 3               | 5.2  |
|                                                                                                                       | Not Documented        | 0               | 0    |
| <b>2 Surgical mask provided to patient within 1 hour</b>                                                              | Yes                   | 0               | 0    |
|                                                                                                                       | No                    | 13              | 22.4 |
|                                                                                                                       | Not applicable        | 5               | 8.6  |
|                                                                                                                       | Not documented        | 40              | 70   |
| <b>3. Infection control/virology discussion within 1 hour</b>                                                         | Yes                   | 21              | 36.2 |
|                                                                                                                       | No                    | 24              | 41.4 |
|                                                                                                                       | Not applicable        | 3               | 5.2  |
|                                                                                                                       | Not documented        | 10              | 17.2 |
| <b>4. Bay closure within 1 hour</b>                                                                                   | Yes                   | 15              | 25.9 |
|                                                                                                                       | No                    | 7               | 12.1 |
|                                                                                                                       | Not applicable        | 17              | 29.3 |
|                                                                                                                       | Not documented        | 17              | 29.3 |
| <b>5 Side room isolation within 2 hours</b>                                                                           | Yes                   | 22              | 37.9 |
|                                                                                                                       | No                    | 11              | 19   |
|                                                                                                                       | Not applicable        | 12              | 20.7 |
|                                                                                                                       | Not documented        | 13              | 22.4 |
| <b>6 Escalation of Personal Protective Equipment precautions for both patient and their contacts (within 2 hours)</b> | Yes                   | 6               | 10.3 |
|                                                                                                                       | No                    | 7               | 12.1 |
|                                                                                                                       | Not applicable        | 9               | 15.5 |
|                                                                                                                       | Not documented        | 36              | 62.1 |
| <b>7 Swab for SARS-CoV-2 PCR collected within 2 hours</b>                                                             | Yes                   | 33              | 56.9 |
|                                                                                                                       | No                    | 3               | 5.2  |
|                                                                                                                       | Not applicable        | 8               | 13.8 |
|                                                                                                                       | Not documented        | 14              | 24.1 |
| <b>8 Moved to a COVID-19 cohort area on result within 12 hours</b>                                                    | Yes                   | 35              | 60.3 |
|                                                                                                                       | No                    | 4               | 6.9  |
|                                                                                                                       | Not applicable        | 16              | 27.6 |
|                                                                                                                       | Not documented        | 3               | 5.2  |
| <b>9 Contacts monitored and isolated for 14 days?</b>                                                                 | Yes                   | 9               | 15.5 |
|                                                                                                                       | No                    | 1               | 1.7  |
|                                                                                                                       | Not applicable        | 13              | 22.4 |
|                                                                                                                       | Not documented        | 35              | 60.3 |
| <b>10 Electronic alert 'COVID-19 contact' placed on contacts' notes</b>                                               | Yes                   | 2               | 3.4  |
|                                                                                                                       | No                    | 0               | 0    |
|                                                                                                                       | Not applicable        | 17              | 29.3 |
|                                                                                                                       | Not documented        | 39              | 67.2 |
| <b>11 Bed space appropriately cleaned prior to patient's arrival?</b>                                                 | Yes                   | 2               | 3.4  |
|                                                                                                                       | No                    | 0               | 0    |
|                                                                                                                       | Not applicable        | 0               | 0    |
|                                                                                                                       | Not documented        | 56              | 96.6 |
| <b>12 Bed space appropriately cleaned after patient moved ( within 2 hours)</b>                                       | Yes                   | 2               | 3.4  |
|                                                                                                                       | No                    | 0               | 0    |
|                                                                                                                       | Not applicable        | 0               | 0    |
|                                                                                                                       | Not documented        | 56              | 96.6 |

Yes = documented in the notes as having occurred, No = documented as not having occurred. N/a = not applicable to an individual patient e.g. for standard 5 – patient already in a side room prior to suspicion of COVID. Not documented = no documentation in patient notes. For the purpose of calculating adherence to a standard, the non applicable group were removed.
